# Supplementary material for: Socioeconomic and health outcome associations with lifestyle choices uncovered by wastewater information mining
Source: Research Square preprint supplement (doi:10.21203/rs.3.rs-7658391/v1), 2025-10-14
Supplement: Supplementary file 1 [file 2682bcee6bc4dc42de056cd2.docx]

**Socioeconomic and health outcome associations with lifestyle choices uncovered by wastewater information mining**

Barbara Kasprzyk-Hordern1,2*, Kishore Jagadeesan1,2, Natalie Sims1, Davey Jones3,4, Matthew J. Wade2,5

*1Department of Chemistry, University of Bath, Claverton Down, Bath, BA2 7AY, UK*

*2Centre of Excellence in Water Based Early Warning Systems for Health Protection, Bath, BA2 7AY, UK*

*3School of Environmental and Natural Sciences, Bangor University, Bangor, Gwynedd, LL57 2UW, UK*

*4Verily Life Sciences LLC., Dallas, Texas 75019, United States*

*5Chief Data Officer Group, UK Health Security Agency, London, E14 4PU, UK*

**Author for correspondence: B.Kasprzyk-Hordern@bath.ac.uk*

**Estimation of Socioeconomic and Demographic Indicators (ONSSEDIs) for WWTP Catchments**

Demographic and socioeconomic indicators (ONSSEDIs) for each wastewater treatment plant (WWTP) catchment were estimated using 2021 Census data from the UK Office for National Statistics (ONS), provided at the Output Area (OA) level1. OAs are the smallest geographical units for which census statistics are published, designed to have similar population sizes. They typically encompass between 40 to 250 households and accommodate a resident population ranging from 100 to 625 individuals. Geospatial shapefiles for OAs are publicly accessible from the ONS, while WWTP catchment maps were provided by the partner water companies.

The core of the methodology involved a spatial overlay procedure performed in R2 to map the census data from the standard OA boundaries to the bespoke WWTP catchment boundaries. For each OA, the proportion of its geographical area that overlapped with the WWTP catchment (Overlap%) was calculated. The count for each census variable within an OA was then weighted by this percentage:

- If an OA was fully contained within a catchment (Overlap% = 100%), its entire count for a given variable was included.
- For OAs that were only partially overlapping with a catchment, the count for each variable was scaled by its Overlap%. For example, if an OA with 200 residents was 50% inside the catchment boundary, a count of 100 residents was allocated to the catchment from that OA.

All resulting fractional counts were rounded to the nearest integer before being aggregated with data from all other overlapping OAs to produce a final, catchment-level estimate for each variable. This spatial weighting method, which assumes a uniform distribution of characteristics within an OA, is a robust and widely-used approach for estimating population characteristics in bespoke geographical areas like WWTP catchments where direct census data is unavailable3.

This methodology was applied to all >70 ONSSEDI variables used in the main analysis, covering domains of Demography, Education, Ethnic and cultural identity, Health and care, and Housing. A primary output of this process was the Population Estimate from Census data (PECEN), which was used to calculate population-normalised loads for the wastewater chemical indicators.

**References**

1. ONS Census 2021 Bulk - Nomis - Official Census and labour market statistics. <https://www.nomisweb.co.uk/sources/census_2021_bulk> (20/01/2025),

2. Ihaka, R.; Gentleman, R., R: a language for data analysis and graphics. *Journal of computational and graphical statistics* **1996,** *5*, (3), 299-314.

3. Kasprzyk-Hordern, B.; Jagadeesan, K.; Sims, N.; Farkas, K.; Proctor, K.; Bagnall, J.; Robertson, M.; Jones, D. L.; Wade, M. J., Multi-biomarker approach for estimating population size in a national-scale wastewater-based epidemiology study. *Water Res.* **2025,** *268*, 122527.
